# Supplementary material for: Integrating Biochar, Bacteria, and Plants for Sustainable Remediation of Soils Contaminated with Organic Pollutants
Source: PubMed Central journal article supplement — Environ Sci Technol. 2022 Oct 27;56(23):16546–66. doi: 10.1021/acs.est.2c02976 (PMC9730858; doi:10.1021/acs.est.2c02976), 2022-10-27
Supplement: es2c02976_si_001.pdf [file es2c02976_si_001.pdf]

*Supplementary Information*

*for*

**Integrating biochar, bacteria, and plants for sustainable remediation of soils contaminated with organic pollutants**

*Leilei Xiang<sup>a,b,#</sup>, Jean Damascene Harindintwali<sup>a,b,#</sup>, Fang Wang<sup>a,b,k,\*</sup>, Marc Redmile-Gordon<sup>c</sup>, Scott X. Chang<sup>d</sup>, Chao He<sup>e</sup>, Bertrand Muhoza<sup>f</sup>, Yuhao Fu<sup>a,b</sup>, Ferdi Brahusi<sup>g</sup>, Nanthi Bolan<sup>h</sup>, Xin Jiang<sup>a,b</sup>, Yong Sik Ok<sup>i</sup>, Jörg Rinklebe<sup>j</sup>, Andreas Schaeffer<sup>k</sup>, Yong-guan Zhu<sup>l,m,b</sup>, James M. Tiedje<sup>n</sup>, Baoshan Xing<sup>o</sup>*

*<sup>a</sup> CAS Key Laboratory of Soil Environment and Pollution Remediation, Institute of Soil Science, Chinese Academy of Sciences, Nanjing 210008, China*

*<sup>b</sup> University of Chinese Academy of Sciences, Beijing 100049, China*

*<sup>c</sup> Department of Environmental Horticulture, Royal Horticultural Society, Wisley, Surrey, GU23 6QB, UK*

*<sup>d</sup> Department of Renewable Resources, University of Alberta, Edmonton, Alberta, Canada*

*<sup>e</sup> State Key Laboratory of Urban and Regional Ecology, Research Center for Eco-Environmental Sciences, Chinese Academy of Sciences, Beijing 100085, China*

*<sup>f</sup> College of Food Science, Northeast Agricultural University, Harbin, Heilongjiang, 150030, China*

*<sup>g</sup> Department of Agroenvironment and Ecology, Agricultural University of Tirana, Tirana 1029, Albania*

*<sup>h</sup> School of Agriculture and Environment, The UWA Institute of Agriculture, The University of Western Australia, Perth, Western Australia 6001, Australia;*

<sup>i</sup> *Korea Biochar Research Center, APRU Sustainable Waste Management Program & Division of Environmental Science and Ecological Engineering, Korea University, Seoul, 02841, Republic of Korea*

<sup>j</sup> *Department of Soil and Groundwater Management, Bergische Universität Wuppertal, Germany*

<sup>k</sup> *Institute for Environmental Research, RWTH Aachen University, 52074 Aachen, Germany*

<sup>l</sup> *Key Laboratory of Urban Environment and Health, Institute of Urban Environment, Chinese Academy of Sciences, Xiamen 361021, China*

<sup>m</sup> *State Key Laboratory of Urban and Regional Ecology, Research Center for Eco-Environmental Sciences, Chinese Academy of Sciences, Beijing 100085, China*

<sup>n</sup> *Center for Microbial Ecology, Department of Plant, Soil and Microbial Sciences, Michigan State University, MI, 48824, USA*

<sup>o</sup> *Stockbridge School of Agriculture, University of Massachusetts, Amherst, MA 01003, USA*

<sup>#</sup> *These authors contributed equally to this work*

<sup>\*</sup> *Corresponding author:*

[wangfang@issas.ac.cn](mailto:wangfang@issas.ac.cn), [fangwang321@issas.ac.cn](mailto:fangwang321@issas.ac.cn) (F. Wang)

*The following are included as supporting information for this paper:*

*Number of pages: 28*

*Supplementary Tables: 3*

**Table S1. Physico-chemical properties of biochars obtained from various feedstocks at various pyrolysis temperatures**

| Feedstock            | Pyrolysis Temperature (°C) | C (%) | H (%) | H.C ratio | N (%) | S (%) | O (%) | O.C ratio | C.N ratio | ON.C ratio | SA (m <sup>2</sup> .g <sup>-1</sup> ) | TPV (cm <sup>3</sup> .g <sup>-1</sup> ) | pH   | Ash Content (%) | V M (%) | EC (μS cm <sup>-1</sup> ) | CEC (cmol kg <sup>-1</sup> ) | References                |
|----------------------|----------------------------|-------|-------|-----------|-------|-------|-------|-----------|-----------|------------|---------------------------------------|-----------------------------------------|------|-----------------|---------|---------------------------|------------------------------|---------------------------|
| Wheat straw          | 550                        | 69.9  | 2.2   | 0.032     | 0.23  |       | 10.9  | 0.157     | 303.7     | 0.160      |                                       |                                         | 9.6  | 16.8            |         |                           |                              | Wang et al. <sup>1</sup>  |
| Wheat straw          | 850                        | 80.1  | 0.9   | 0.011     | 0.12  |       | 1.5   | 0.019     | 667.8     | 0.020      |                                       |                                         | 10.4 | 17.4            |         |                           |                              | Wang et al. <sup>1</sup>  |
| Beet pulp            | 400                        | 59.3  | 3.8   | 0.064     | 0.90  | 0.20  | 21.8  | 0.368     | 65.9      | 0.383      |                                       |                                         |      |                 |         |                           |                              | Jerzy et al. <sup>2</sup> |
| Beet pulp            | 500                        | 61.2  | 3.1   | 0.051     | 0.90  | 0.20  | 20.0  | 0.327     | 68.0      | 0.342      |                                       |                                         |      |                 |         |                           |                              | Jerzy et al. <sup>2</sup> |
| Wheat straw          | 400                        | 49.5  | 3.9   | 0.079     | 1.10  | 0.10  | 15.0  | 0.303     | 45.0      | 0.325      |                                       |                                         |      |                 |         |                           |                              | Jerzy et al. <sup>2</sup> |
| Mixture              | 400                        | 58.2  | 2.7   | 0.046     | 0.90  | 0.10  | 17.2  | 0.296     | 64.7      | 0.311      |                                       |                                         |      |                 |         |                           |                              | Jerzy et al. <sup>2</sup> |
| Wheat straw          | 500                        | 51.3  | 2.9   | 0.057     | 1.30  | 0.10  | 13.3  | 0.259     | 39.5      | 0.285      |                                       |                                         |      |                 |         |                           |                              | Jerzy et al. <sup>2</sup> |
| Mixture              | 500                        | 61.1  | 1.8   | 0.029     | 0.80  | 0.10  | 12.1  | 0.198     | 76.4      | 0.211      |                                       |                                         |      |                 |         |                           |                              | Jerzy et al. <sup>2</sup> |
| Rice husk mushroom   | 500                        | 63.5  | 3.1   | 0.048     | 5.38  |       | 13.4  | 0.210     | 11.8      | 0.295      |                                       |                                         |      | 14.4            | 17.2    |                           |                              | Liu et al. <sup>3</sup>   |
| Corn cob             | 500                        | 72.3  | 2.6   | 0.036     | 0.55  |       | 14.6  | 0.201     | 131.4     | 0.209      |                                       |                                         |      | 9.5             | 37.2    |                           |                              | Liu et al. <sup>3</sup>   |
| Cottonseed shell     | 500                        | 69.5  | 2.0   | 0.028     | 1.10  |       | 11.7  | 0.169     | 63.1      | 0.185      |                                       |                                         |      | 15.7            | 20.6    |                           |                              | Liu et al. <sup>3</sup>   |
| Wheat straw mushroom | 500                        | 66.7  | 2.8   | 0.042     | 5.38  |       | 10.7  | 0.161     | 12.4      | 0.242      |                                       |                                         |      | 14.2            | 17.5    |                           |                              | Liu et al. <sup>3</sup>   |

|                           |     |      |     |       |      |      |       |       |       |       |       |                         |        |                                |
|---------------------------|-----|------|-----|-------|------|------|-------|-------|-------|-------|-------|-------------------------|--------|--------------------------------|
| Corn cob mushroom         | 500 | 65.5 | 3.0 | 0.045 | 5.88 | 10.4 | 0.159 | 11.1  | 0.248 | 15.1  | 17.2  | Liu et al. <sup>3</sup> |        |                                |
| Cottonseed shell mushroom | 500 | 66.2 | 3.6 | 0.055 | 5.74 | 10.4 | 0.156 | 11.5  | 0.243 | 14.0  | 19.3  | Liu et al. <sup>3</sup> |        |                                |
| Rice husk                 | 500 | 50.9 | 2.1 | 0.041 | 0.47 | 7.9  | 0.156 | 108.3 | 0.165 | 38.6  | 31.9  | Liu et al. <sup>3</sup> |        |                                |
| Wheat straw               | 500 | 61.8 | 2.2 | 0.036 | 1.37 | 7.1  | 0.115 | 45.1  | 0.138 | 27.5  | 20.4  | Liu et al. <sup>3</sup> |        |                                |
| Sewage sludge             | 500 | 25.3 | 0.8 | 0.030 | 3.00 | 6.7  | 0.265 | 8.4   | 0.383 | 33.2  | 0.079 | 9.2                     | 64.3   | A Siatecka et al. <sup>4</sup> |
| Willow                    | 500 | 82.4 | 2.3 | 0.028 | 1.09 | 13.4 | 0.163 | 75.6  | 0.176 | 229.3 | 0.108 | 9.3                     | 0.8    | A Siatecka et al. <sup>4</sup> |
| Willow                    | 700 | 80.6 | 1.0 | 0.012 | 1.15 | 11.9 | 0.148 | 70.1  | 0.162 | 0.3   | 0.004 | 11.5                    | 5.3    | A Siatecka et al. <sup>4</sup> |
| Sewage sludge             | 700 | 24.7 | 0.2 | 0.009 | 1.43 | 0.9  | 0.038 | 17.3  | 0.096 | 63.3  | 0.113 | 11.8                    | 72.8   | A Siatecka et al. <sup>4</sup> |
| Poplar sawdust            | 700 | 62.4 | 2.5 | 0.039 | 2.64 | 19.9 | 0.318 | 23.6  | 0.361 | 572.6 | 0.280 | 12.5                    |        | Zhu et al. <sup>5</sup>        |
| Sludge                    | 300 | 24.0 | 2.7 | 0.112 | 3.36 |      |       | 7.1   |       |       |       | 7.3                     | 362.0  | Li et al. <sup>6</sup>         |
| Pine                      | 300 | 67.1 | 5.6 | 0.083 | 1.84 |      |       | 36.5  |       |       |       | 7.6                     | 226.0  | Li et al. <sup>6</sup>         |
| Alfalfa                   | 300 | 68.9 | 5.4 | 0.079 | 3.40 |      |       | 20.3  |       |       |       | 9.4                     | 2716.0 | Li et al. <sup>6</sup>         |
| Manure                    | 300 | 55.7 | 4.2 | 0.075 | 2.11 |      |       | 26.4  |       |       |       | 9.4                     | 550.0  | Li et al. <sup>6</sup>         |
| Sludge                    | 500 | 18.7 | 1.4 | 0.073 | 2.50 |      |       | 7.5   |       |       |       | 7.9                     | 155.0  | Li et al. <sup>6</sup>         |
| Wheat                     | 300 | 68.1 | 4.9 | 0.072 | 0.35 |      |       | 194.5 |       |       |       | 7.7                     | 1403.0 | Li et al. <sup>6</sup>         |

|              |     |      |     |       |      |      |      |       |      |       |      |       |        |      |      |     |                        |                           |
|--------------|-----|------|-----|-------|------|------|------|-------|------|-------|------|-------|--------|------|------|-----|------------------------|---------------------------|
| Walnut       | 300 | 71.3 | 5.0 | 0.070 | 0.36 |      |      | 197.9 |      | 7.8   |      |       | 78.0   |      |      |     | Li et al. <sup>6</sup> |                           |
| Sludge       | 700 | 17.9 | 1.1 | 0.064 | 1.99 |      |      | 9.0   |      | 8.5   |      |       | 197.0  |      |      |     | Li et al. <sup>6</sup> |                           |
| Pine         | 500 | 79.9 | 3.4 | 0.042 | 2.11 |      |      | 37.9  |      | 10.3  |      |       | 673.0  |      |      |     | Li et al. <sup>6</sup> |                           |
| Manure       | 500 | 57.5 | 2.4 | 0.042 | 1.60 |      |      | 35.9  |      | 10.8  |      |       | 823.0  |      |      |     | Li et al. <sup>6</sup> |                           |
| Alfalfa      | 500 | 76.0 | 3.1 | 0.041 | 2.74 |      |      | 27.7  |      | 10.8  |      |       | 4120.0 |      |      |     | Li et al. <sup>6</sup> |                           |
| Wheat        | 500 | 80.3 | 3.1 | 0.038 | 0.34 |      |      | 236.1 |      | 9.9   |      |       | 2673.0 |      |      |     | Li et al. <sup>6</sup> |                           |
| Walnut       | 500 | 84.5 | 3.2 | 0.038 | 0.42 |      |      | 201.3 |      | 9.8   |      |       | 322.0  |      |      |     | Li et al. <sup>6</sup> |                           |
| Wheat        | 700 | 69.8 | 2.2 | 0.031 | 0.52 |      |      | 134.2 |      | 10.2  |      |       | 3047.0 |      |      |     | Li et al. <sup>6</sup> |                           |
| Alfalfa      | 700 | 77.0 | 2.4 | 0.031 | 2.82 |      |      | 27.3  |      | 11.0  |      |       | 5390.0 |      |      |     | Li et al. <sup>6</sup> |                           |
| Manure       | 700 | 55.3 | 1.6 | 0.029 | 1.39 |      |      | 39.8  |      | 10.6  |      |       | 1011.0 |      |      |     | Li et al. <sup>6</sup> |                           |
| Pine         | 700 | 81.2 | 2.3 | 0.028 | 1.85 |      |      | 43.9  |      | 10.6  |      |       | 947.0  |      |      |     | Li et al. <sup>6</sup> |                           |
| Walnut       | 700 | 90.8 | 2.0 | 0.022 | 0.47 |      |      | 193.3 |      | 10.0  |      |       | 558.0  |      |      |     | Li et al. <sup>6</sup> |                           |
| Pine needles | 400 | 61.7 | 2.6 | 0.041 | 0.97 | 0.05 | 24.5 | 0.397 | 63.6 | 0.412 | 12.5 | 1.620 | 8.1    | 10.3 | 31.5 | 2.6 | 29.5                   | Shaon et al. <sup>7</sup> |
| maize stalk  | 400 | 58.8 | 4.0 | 0.068 | 1.39 | 0.08 | 20.6 | 0.351 | 42.3 | 0.375 | 12.9 | 2.430 | 8.6    | 15.2 | 26.6 | 0.8 | 38.6                   | Shaon et al. <sup>7</sup> |
| Black gram   | 500 | 56.7 | 3.1 | 0.055 | 1.24 | 0.06 | 15.6 | 0.275 | 45.7 | 0.297 | 20.4 | 2.070 | 9.2    | 23.3 | 23.6 | 1.0 | 42.7                   | Shaon et al. <sup>7</sup> |

|                |     |          |     |           |      |      |          |           |       |           |       |       |          |      |          |     |      |                                |
|----------------|-----|----------|-----|-----------|------|------|----------|-----------|-------|-----------|-------|-------|----------|------|----------|-----|------|--------------------------------|
| Pine needles   | 500 | 65.<br>8 | 2.1 | 0.03<br>2 | 0.78 | 0.04 | 17.<br>8 | 0.27<br>0 | 84.4  | 0.28<br>2 | 21.8  | 2.320 | 8.9      | 13.5 | 27.<br>6 | 2.8 | 32.2 | Shaon et al. <sup>7</sup>      |
| Maize stalk    | 500 | 61.<br>9 | 3.6 | 0.05<br>8 | 1.17 | 0.07 | 13.<br>7 | 0.22<br>1 | 52.9  | 0.24<br>0 | 23.2  | 3.130 | 9.4      | 19.7 | 20.<br>7 | 1.0 | 47.6 | Shaon et al. <sup>7</sup>      |
| Lantana camara | 400 | 69.<br>8 | 3.1 | 0.04<br>4 | 1.01 |      | 14.<br>5 | 0.20<br>8 | 69.1  | 0.22<br>2 | 12.7  | 2.890 | 8.2      | 11.6 | 28.<br>8 | 0.5 | 31.9 | Shaon et al. <sup>7</sup>      |
| Pine needles   | 600 | 68.<br>4 | 1.9 | 0.02<br>8 | 0.57 | 0.06 | 12.<br>4 | 0.18<br>2 | 120.0 | 0.19<br>0 | 40.2  | 2.720 | 10.<br>0 | 16.7 | 24.<br>5 | 3.0 | 37.6 | Shaon et al. <sup>7</sup>      |
| black gram     | 600 | 60.<br>3 | 2.9 | 0.04<br>8 | 1.02 | 0.08 | 9.3      | 0.15<br>4 | 59.1  | 0.17<br>1 | 38.9  | 2.470 | 10.<br>3 | 26.5 | 20.<br>6 | 1.1 | 49.6 | Shaon et al. <sup>7</sup>      |
| Lantana camara | 500 | 70.<br>5 | 2.7 | 0.03<br>8 | 0.86 |      | 10.<br>3 | 0.14<br>5 | 82.0  | 0.15<br>8 | 22.1  | 3.590 | 9.0      | 15.7 | 22.<br>6 | 0.7 | 33.6 | Shaon et al. <sup>7</sup>      |
| maize stalk    | 600 | 65.<br>5 | 3.3 | 0.05<br>0 | 0.99 | 0.09 | 6.8      | 0.10<br>4 | 66.2  | 0.12<br>0 | 43.9  | 3.530 | 10.<br>5 | 23.4 | 17.<br>8 | 1.2 | 55.5 | Shaon et al. <sup>7</sup>      |
| Lantana camara | 600 | 74.<br>1 | 2.4 | 0.03<br>2 | 0.61 |      | 2.7      | 0.03<br>6 | 121.5 | 0.04<br>5 | 41.4  | 3.990 | 10.<br>2 | 20.2 | 19.<br>5 | 0.9 | 39.5 | Shaon et al. <sup>7</sup>      |
| Corn stover    | 450 | 48.<br>0 |     |           | 3.40 |      |          |           | 14.1  |           | 229.0 |       | 9.2      | 28.0 |          | 4.0 |      | Lumarie et al. <sup>8</sup>    |
| Hardwood       | 450 | 77.<br>0 |     |           | 0.00 |      |          |           |       |           | 388.0 |       | 8.2      | 0.8  |          | 0.2 |      | Lumarie et al. <sup>8</sup>    |
| Norway spruce  | 700 | 71.<br>4 | 0.4 | 0.00<br>5 | 1.40 | 0.02 | 26.<br>8 | 0.37<br>5 | 51.0  | 0.39<br>5 | 46.2  | 0.050 |          | 15.3 | 14.<br>3 |     |      | Oluwatosin et al. <sup>9</sup> |
| White Pine     | 500 | 71.<br>8 | 3.0 | 0.04<br>2 | 2.52 | 0.17 | 22.<br>5 | 0.31<br>4 | 28.5  | 0.34<br>9 | 6.3   | 0.010 |          | 7.2  | 18.<br>5 |     |      | Oluwatosin et al. <sup>9</sup> |
| White pine     | 700 | 76.<br>1 | 0.7 | 0.01<br>0 | 2.07 | 0.04 | 21.<br>1 | 0.27<br>7 | 36.7  | 0.30<br>5 | 58.5  | 0.020 |          | 7.9  | 11.<br>6 |     |      | Oluwatosin et al. <sup>9</sup> |
| White pine     | 900 | 76.<br>8 | 0.8 | 0.01<br>0 | 0.95 | 0.09 | 21.<br>3 | 0.27<br>7 | 80.8  | 0.29<br>0 | 156.1 | 0.060 |          | 9.0  | 9.1      |     |      | Oluwatosin et al. <sup>9</sup> |
| Norway Spruce  | 900 | 77.<br>4 | 0.6 | 0.00<br>7 | 0.92 | 0.05 | 21.<br>0 | 0.27<br>2 | 84.1  | 0.28<br>4 | 167.7 | 0.080 |          | 16.1 | 10.<br>6 |     |      | Oluwatosin et al. <sup>9</sup> |

|                                  |     |      |     |       |      |      |      |       |       |       |      |      |      |      |      |  |  |                              |
|----------------------------------|-----|------|-----|-------|------|------|------|-------|-------|-------|------|------|------|------|------|--|--|------------------------------|
| Sewage sludge after acid washing | 500 | 55.9 | 3.1 | 0.055 | 7.24 | 3.03 |      | 7.7   | 369.8 | 0.450 |      | 11.9 |      |      |      |  |  | Li et al. <sup>10</sup>      |
| Sewage sludge after acid washing | 600 | 58.9 | 2.8 | 0.047 | 6.04 | 3.41 |      | 9.8   | 667.3 | 0.880 |      | 12.3 |      |      |      |  |  | Li et al. <sup>10</sup>      |
| Sewage sludge after acid washing | 700 | 58.4 | 2.3 | 0.039 | 4.10 | 3.84 |      | 14.2  | 561.6 | 0.810 |      | 14.6 |      |      |      |  |  | Li et al. <sup>10</sup>      |
| Phytoremediation residue         | 350 | 58.1 | 2.7 | 0.046 |      |      | 17.1 | 0.294 | 3.3   | 0.020 | 7.9  | 29.2 | 1.2  |      |      |  |  | Huang et al. <sup>11</sup>   |
| Phytoremediation residue         | 550 | 49.2 | 2.1 | 0.042 |      |      | 11.0 | 0.223 | 131.7 | 0.070 | 10.0 | 44.5 | 1.0  |      |      |  |  | Huang et al. <sup>11</sup>   |
| Phytoremediation residue         | 750 | 47.8 | 0.9 | 0.019 |      |      | 6.9  | 0.144 | 241.3 | 0.110 | 10.1 | 48.5 | 1.1  |      |      |  |  | Huang et al. <sup>11</sup>   |
| Rice straw                       | 900 | 53.4 |     |       | 1.70 |      |      | 31.4  | 209.2 | 0.320 | 10.1 |      |      |      |      |  |  | Yang et al. <sup>12</sup>    |
| Groundnut shell                  | 600 | 75.3 | 1.2 | 0.016 | 1.70 |      | 21.8 | 0.290 | 44.3  | 0.312 |      |      |      |      |      |  |  | Vaghela et al. <sup>13</sup> |
| Vine pruning                     | 350 | 64.7 | 4.1 | 0.063 | 1.30 | 0.40 | 21.3 | 0.328 | 49.8  | 0.349 | 10.3 | 30.2 | 10.9 | 47.4 |      |  |  | Asli et al. <sup>14</sup>    |
| Poultry litter                   | 350 | 57.0 | 3.2 | 0.056 | 5.30 | 0.20 | 15.9 | 0.279 | 10.8  | 0.372 | 11.3 | 32.7 | 15.8 | 55.5 |      |  |  | Asli et al. <sup>14</sup>    |
| Orange pomace                    | 350 | 64.9 | 4.5 | 0.070 | 2.42 | 0.03 | 16.8 | 0.258 | 26.8  | 0.296 | 9.9  | 32.3 | 11.3 | 1.3  | 35.2 |  |  | Asli et al. <sup>14</sup>    |
| Orange pomace                    | 500 | 63.8 | 3.1 | 0.048 | 3.19 |      | 15.7 | 0.247 | 20.0  | 0.297 | 10.3 | 24.0 | 3.0  | 29.8 |      |  |  | Asli et al. <sup>14</sup>    |
| Seaweed                          | 500 | 45.3 | 2.2 | 0.048 | 1.40 | 0.31 | 10.9 | 0.241 | 32.3  | 0.272 | 13.3 | 21.1 | 29.9 | 57.5 |      |  |  | Asli et al. <sup>14</sup>    |
| Seaweed                          | 600 | 45.1 | 1.4 | 0.032 | 1.42 |      | 9.3  | 0.207 | 31.8  | 0.238 | 13.7 | 11.6 | 30.3 | 49.8 |      |  |  | Asli et al. <sup>14</sup>    |

|                                 |     |          |     |           |      |      |          |           |      |           |       |          |      |          |      |      |                              |
|---------------------------------|-----|----------|-----|-----------|------|------|----------|-----------|------|-----------|-------|----------|------|----------|------|------|------------------------------|
| Vine pruning                    | 500 | 71.<br>3 | 3.4 | 0.04<br>7 | 1.42 |      | 13.<br>3 | 0.18<br>7 | 50.2 | 0.20<br>7 |       | 11.<br>0 | 10.6 | 19.<br>8 | 13.4 | 40.4 | Asli et al. <sup>14</sup>    |
| Poultry litter                  | 500 | 60.<br>4 | 2.4 | 0.04<br>0 | 4.16 |      | 11.<br>3 | 0.18<br>6 | 14.5 | 0.25<br>5 |       | 11.<br>9 | 21.8 | 21.<br>6 | 22.9 | 48.4 | Asli et al. <sup>14</sup>    |
| Vine pruning                    | 600 | 72.<br>3 | 2.5 | 0.03<br>4 | 1.45 |      | 12.<br>3 | 0.17<br>1 | 49.8 | 0.19<br>1 |       | 11.<br>3 | 11.5 | 12.<br>1 | 13.7 | 32.2 | Asli et al. <sup>14</sup>    |
| Orange pomace                   | 600 | 68.<br>1 | 2.4 | 0.03<br>5 | 2.92 |      | 10.<br>4 | 0.15<br>2 | 23.3 | 0.19<br>5 |       | 10.<br>5 | 16.3 | 17.<br>3 | 3.2  | 25.6 | Asli et al. <sup>14</sup>    |
| Poultry litter                  | 600 | 56.<br>6 | 2.0 | 0.03<br>6 | 3.86 |      | 8.2      | 0.14<br>5 | 14.7 | 0.21<br>3 |       | 12.<br>6 | 29.3 | 13.<br>7 | 23.8 | 44.4 | Asli et al. <sup>14</sup>    |
| Green coconuts fiber            | 450 | 76.<br>8 | 4.0 | 0.05<br>2 | 2.15 | 0.28 | 16.<br>8 | 0.21<br>9 | 35.7 | 0.24<br>7 | 193.7 | 8.6      | 10.5 | 29.<br>1 | 1.7  |      | Sajib et al. <sup>15</sup>   |
| Green coconuts fiber            | 500 | 78.<br>3 | 2.7 | 0.03<br>5 | 2.37 | 0.19 | 16.<br>4 | 0.20<br>9 | 33.1 | 0.24<br>0 | 278.6 | 9.8      | 11.3 | 19.<br>8 | 1.7  |      | Sajib et al. <sup>15</sup>   |
| Green coconuts fiber            | 550 | 81.<br>5 | 1.9 | 0.02<br>4 | 1.43 | 0.27 | 14.<br>9 | 0.18<br>3 | 57.0 | 0.20<br>1 | 295.6 | 9.6      | 12.2 | 17.<br>6 | 1.5  |      | Sajib et al. <sup>15</sup>   |
| Green coconuts fiber            | 600 | 84.<br>9 | 1.8 | 0.02<br>1 | 1.71 | 0.19 | 11.<br>4 | 0.13<br>4 | 49.7 | 0.15<br>4 | 286.7 | 10.<br>0 | 12.2 | 16.<br>7 | 1.6  |      | Sajib et al. <sup>15</sup>   |
| Cow manure                      | 500 | 45.<br>9 | 2.1 | 0.04<br>6 | 7.58 | 0.73 | 2.0      | 0.04<br>4 | 6.1  | 0.20<br>9 |       |          | 41.7 | 19.<br>9 |      |      | Guo et al. <sup>57</sup>     |
| Cow manure                      | 500 | 54.<br>7 | 2.4 | 0.04<br>4 | 10.7 | 0.56 | 1.8      | 0.03<br>2 | 5.1  | 0.22<br>8 |       |          | 29.9 | 19.<br>8 |      |      | Guo et al. <sup>57</sup>     |
| Anaerobic fermentation residues | 500 | 54.<br>3 | 2.4 | 0.04<br>5 | 10.3 | 0.54 | 1.7      | 0.03<br>1 | 5.2  | 0.22<br>2 |       |          | 30.6 | 18.<br>1 |      |      | Guo et al. <sup>57</sup>     |
| Sugarcane filter cake           | 400 | 39.<br>5 |     |           | 1.80 |      |          |           | 21.9 |           | 13.5  | 8.6      |      |          |      |      | Tatiana et al. <sup>16</sup> |
| Sugarcane filter cake           | 600 | 35.<br>0 |     |           | 1.50 |      |          |           | 23.3 |           | 41.3  | 8.4      |      |          | 3.9  |      | Tatiana et al. <sup>16</sup> |
| Swine manure                    | 400 | 49.<br>6 |     |           | 2.70 |      |          |           | 18.4 |           | 7.2   | 9.2      |      |          | 10.8 |      | Tatiana et al. <sup>16</sup> |



|                      |     |      |     |       |      |      |     |       |       |       |       |      |      |      |        |                               |
|----------------------|-----|------|-----|-------|------|------|-----|-------|-------|-------|-------|------|------|------|--------|-------------------------------|
| Swine manure         | 600 | 47.0 |     |       | 1.80 |      |     |       | 26.1  | 36.9  |       | 10.7 |      |      | 28.9   | Tatiana et al. <sup>16</sup>  |
| Cotton husk          | 400 | 69.8 |     |       | 2.00 |      |     |       | 34.9  | 0.2   |       | 10.0 |      |      | 45.4   | Tatiana et al. <sup>16</sup>  |
| Cotton husk          | 600 | 65.6 |     |       | 1.80 |      |     |       | 36.4  | 1.9   |       | 10.0 |      |      | 49.0   | Tatiana et al. <sup>16</sup>  |
| Eucalyptus sawdust   | 400 | 78.5 |     |       | 0.70 |      |     |       | 112.1 | 0.3   |       | 7.7  |      |      | 56.8   | Tatiana et al. <sup>16</sup>  |
| Eucalyptus sawdust   | 600 | 84.0 |     |       | 0.80 |      |     |       | 105.0 | 132.0 |       | 9.6  |      |      | 3.7    | Tatiana et al. <sup>16</sup>  |
| Miscanthus           | 450 | 64.4 |     |       | 0.80 |      |     |       | 80.5  | 371.9 |       | 5.9  |      |      | 19.8   | Tatiana et al. <sup>16</sup>  |
| Biosolids            | 425 | 60.0 | 7.0 | 0.117 | 5.00 | 6.00 |     |       | 12.0  | 206.0 |       | 9.1  |      |      | 20.1   | Shekhar et al. <sup>17</sup>  |
| Biosolids            | 550 | 64.0 | 5.0 | 0.078 | 4.00 | 5.00 |     |       | 16.0  | 432.0 |       | 9.1  |      |      | 33.0   | Shekhar et al. <sup>17</sup>  |
| Feedlot manure       | 700 | 52.4 | 0.9 | 0.017 | 1.70 | 0.40 | 7.2 | 0.137 | 30.8  | 0.170 | 145.2 | 10.3 | 44.0 | 19.8 | 1.1    | Cantrell et al. <sup>18</sup> |
| Dairy manure         | 700 | 56.7 | 0.9 | 0.017 | 1.51 | 0.15 | 4.1 | 0.073 | 37.5  | 0.100 | 186.5 | 9.9  | 39.5 | 27.7 | 0.7    | Cantrell et al. <sup>18</sup> |
| Swine solids         | 350 | 51.5 | 4.9 | 0.095 | 3.54 | 0    | 1.1 | 0.022 | 14.6  | 0.091 | 0.9   | 8.4  | 32.5 | 49.8 | 216.0  | Cantrell et al. <sup>18</sup> |
| Turkey litter        | 350 | 49.3 | 3.6 | 0.073 | 4.07 | 0    | 0.9 | 0.018 | 12.1  | 0.100 | 2.6   | 8.0  | 34.8 | 42.1 | 651.0  | Cantrell et al. <sup>18</sup> |
| Poultry litter       | 350 | 51.1 | 3.8 | 0.074 | 4.45 | 3    | 0.9 | 0.017 | 11.5  | 0.105 | 3.9   | 8.7  | 30.7 | 42.3 | 1405.0 | Cantrell et al. <sup>18</sup> |
| Paved_feedlot manure | 350 | 53.3 | 4.1 | 0.076 | 3.64 | 0    | 0.9 | 0.017 | 14.6  | 0.085 | 1.3   | 9.1  | 28.7 | 47.9 | 713.0  | Cantrell et al. <sup>18</sup> |
| Dairy manure         | 350 | 55.8 | 4.3 | 0.077 | 2.60 | 3    | 0.9 | 0.016 | 21.5  | 0.063 | 1.6   | 9.2  | 24.2 | 53.5 | 538.0  | Cantrell et al. <sup>18</sup> |

|                      |     |      |     |       |      |       |      |       |      |       |       |       |      |      |        |                               |                             |
|----------------------|-----|------|-----|-------|------|-------|------|-------|------|-------|-------|-------|------|------|--------|-------------------------------|-----------------------------|
| Poultry litter       | 700 | 45.9 | 2.0 | 0.043 | 2.07 | 10.53 | 0.5  | 0.011 | 22.2 | 0.056 | 50.9  | 10.3  | 46.2 | 18.3 | 2217.0 | Cantrell et al. <sup>18</sup> |                             |
| Turkey litter        | 700 | 44.8 | 0.9 | 0.020 | 1.94 | 5.80  | 0.2  | 0.005 | 23.1 | 0.049 | 66.7  | 9.9   | 49.9 | 20.8 | 981.0  | Cantrell et al. <sup>18</sup> |                             |
| Swine solids         | 700 | 44.1 | 0.7 | 0.017 | 2.61 | 4.03  | 0.2  | 0.005 | 16.9 | 0.064 | 4.1   | 9.5   | 52.9 | 13.4 | 194.0  | Cantrell et al. <sup>18</sup> |                             |
| Paved_feedlot manure | 700 | 52.4 | 0.9 | 0.017 | 1.70 | 7.20  | 0.2  | 0.004 | 30.8 | 0.036 | 145.2 | 10.3  | 44.0 | 19.8 | 1140.0 | Cantrell et al. <sup>18</sup> |                             |
| Dairy manure         | 700 | 56.7 | 0.9 | 0.017 | 1.51 | 4.13  | 0.2  | 0.004 | 37.5 | 0.030 | 186.5 | 9.9   | 39.5 | 27.7 | 702.0  | Cantrell et al. <sup>18</sup> |                             |
| Eucalyptus residue   | 450 | 75.0 | 3.8 | 0.050 | 1.25 | 0.01  | 19.4 | 0.259 | 60.0 | 0.276 |       | 5.3   | 0.6  | 30.3 | 123.3  | Chaves et al. <sup>19</sup>   |                             |
| Eucalyptus residue   | 550 | 79.3 | 1.0 | 0.013 | 1.49 | 0.01  | 18.0 | 0.227 | 53.2 | 0.246 |       | 6.7   | 0.7  | 16.5 | 97.4   | Chaves et al. <sup>19</sup>   |                             |
| Eucalyptus residue   | 650 | 87.1 | 1.6 | 0.018 |      | 0.02  | 10.7 | 0.123 |      |       | 410.5 | 0.050 | 9.7  | 11.9 | 134.3  | Chaves et al. <sup>19</sup>   |                             |
| Eucalyptus residue   | 950 | 86.9 | 0.9 | 0.010 | 1.34 | 0.01  | 10.6 | 0.122 | 64.9 | 0.137 | 224.4 | 0.020 | 9.2  | 1.1  | 3.6    | 273.1                         | Chaves et al. <sup>19</sup> |
| Eucalyptus residue   | 750 | 87.7 | 0.9 | 0.010 | 1.06 | 0.01  | 9.5  | 0.108 | 82.8 | 0.120 | 402.5 | 0.070 | 9.8  | 0.8  | 5.5    | 164.6                         | Chaves et al. <sup>19</sup> |
| Eucalyptus residue   | 850 | 88.0 | 0.9 | 0.010 | 1.27 | 0.02  | 9.0  | 0.102 | 69.3 | 0.117 | 362.9 | 0.080 | 9.1  | 0.8  | 3.4    | 161.6                         | Chaves et al. <sup>19</sup> |
| Wheat straw          | 300 | 60.2 | 4.4 | 0.073 | 1.43 | 0.36  | 20.1 | 0.335 | 42.1 | 0.358 |       | 8.0   |      |      |        | 0.2                           | Cao et al. <sup>20</sup>    |
| Wheat straw          | 400 | 62.6 | 3.3 | 0.052 | 1.24 | 0.36  | 15.3 | 0.244 | 50.5 | 0.264 |       | 9.5   |      |      |        | 0.2                           | Cao et al. <sup>20</sup>    |
| Wheat straw          | 500 | 65.5 | 2.0 | 0.030 | 1.23 | 0.40  | 10.0 | 0.153 | 53.3 | 0.172 |       | 10.2  |      |      |        | 0.1                           | Cao et al. <sup>20</sup>    |
| Wheat straw          | 600 | 67.4 | 1.2 | 0.018 | 1.15 | 0.41  | 9.1  | 0.135 | 58.6 | 0.152 |       | 10.3  |      |      |        | 0.2                           | Cao et al. <sup>20</sup>    |

|                   |     |      |     |       |      |      |      |       |       |       |       |       |      |      |     |                                  |
|-------------------|-----|------|-----|-------|------|------|------|-------|-------|-------|-------|-------|------|------|-----|----------------------------------|
| Wheat straw       | 700 | 67.5 | 0.7 | 0.011 | 1.18 | 0.42 | 7.3  | 0.108 | 0.125 | 10.4  |       |       |      |      | 0.2 | Cao et al. <sup>20</sup>         |
| Wheat straw       | 800 | 68.9 | 0.4 | 0.006 | 1.20 | 0.42 | 6.8  | 0.099 | 0.117 | 10.4  |       |       |      |      | 0.2 | Cao et al. <sup>20</sup>         |
| Wheat straw       | 900 | 69.3 | 0.3 | 0.004 | 1.17 | 0.44 | 6.5  | 0.093 | 0.110 | 10.2  |       |       |      |      | 0.4 | Cao et al. <sup>20</sup>         |
| Poplar sawdust    | 300 | 73.9 | 2.0 | 0.028 | 0.54 |      | 20.2 | 0.273 | 0.281 |       | 3.0   | 0.006 | 6.5  | 7.9  |     | Xu et al. <sup>21</sup>          |
| Poplar sawdust    | 500 | 84.6 | 1.5 | 0.017 | 0.32 |      | 10.6 | 0.125 | 0.129 |       | 31.0  | 0.028 | 6.9  | 16.8 |     | Xu et al. <sup>21</sup>          |
| Poplar sawdust    | 700 | 89.1 | 0.9 | 0.011 | 0.19 |      | 5.9  | 0.066 | 0.068 |       | 303.0 | 0.182 | 7.7  | 21.5 |     | Xu et al. <sup>21</sup>          |
| Desert date shell | 450 | 72.1 | 4.6 | 0.064 | 4.71 | 0.13 | 18.5 | 0.256 | 0.321 |       |       |       | 6.5  | 32.8 |     | Garba et al. <sup>22</sup>       |
| Desert date shell | 500 | 74.3 | 4.4 | 0.059 | 4.13 | 0.14 | 17.1 | 0.230 | 0.286 |       |       |       | 9.0  | 15.8 |     | Garba et al. <sup>22</sup>       |
| Desert date shell | 550 | 75.0 | 4.2 | 0.056 | 4.45 | 0.19 | 16.2 | 0.217 | 0.276 |       |       |       | 9.2  | 12.6 |     | Garba et al. <sup>22</sup>       |
| Desert date shell | 600 | 75.7 | 4.2 | 0.055 | 4.42 | 0.20 | 15.5 | 0.205 | 0.263 |       |       |       | 11.4 | 7.4  |     | Garba et al. <sup>22</sup>       |
| Wood offcuts      | 600 | 86.1 |     |       | 0.35 |      |      |       |       | 246.1 |       |       |      | 7.0  |     | Kubaczynski et al. <sup>23</sup> |
| Sunflower husk    | 550 | 78.3 |     |       | 0.98 |      |      |       |       | 79.9  |       |       |      | 9.2  |     | Kubaczynski et al. <sup>23</sup> |
| Raspberry stem    | 600 | 74.2 |     |       | 0.90 |      |      |       |       | 82.5  |       |       |      | 9.2  |     | Kubaczynski et al. <sup>23</sup> |
| Potato stem       | 600 | 44.6 |     |       | 1.35 |      |      |       |       | 33.1  |       |       |      | 9.6  |     | Kubaczynski et al. <sup>23</sup> |
| Alfalfa           | 300 | 64.7 | 5.3 | 0.081 | 3.10 |      | 24.2 | 0.375 | 0.422 |       | 0.6   | 0.010 | 9.2  |      |     | Wang et al. <sup>24</sup>        |

|               |     |          |     |           |      |      |          |           |       |           |       |       |          |                            |                          |
|---------------|-----|----------|-----|-----------|------|------|----------|-----------|-------|-----------|-------|-------|----------|----------------------------|--------------------------|
| Citrus        | 450 | 67.<br>6 | 3.6 | 0.05<br>3 | 1.23 |      | 25.<br>0 | 0.37<br>0 | 55.0  | 0.38<br>8 | 2.8   | 0.010 | 10.<br>0 | Wang et al. <sup>24</sup>  |                          |
| Switchgrass   | 600 | 68.<br>2 | 2.2 | 0.03<br>2 | 1.90 |      | 25.<br>0 | 0.36<br>7 | 35.9  | 0.39<br>5 | 15.0  | 0.020 | 9.8      | Wang et al. <sup>24</sup>  |                          |
| Alfalfa       | 450 | 66.<br>6 | 3.0 | 0.04<br>5 | 2.42 |      | 22.<br>1 | 0.33<br>2 | 27.5  | 0.36<br>9 | 0.7   | 0.010 | 10.<br>4 | Wang et al. <sup>24</sup>  |                          |
| Alfalfa       | 600 | 73.<br>3 | 1.9 | 0.02<br>6 | 2.22 |      | 19.<br>4 | 0.26<br>5 | 33.0  | 0.29<br>6 | 0.2   | 0.010 | 10.<br>4 | Wang et al. <sup>24</sup>  |                          |
| Loblolly pine | 300 | 69.<br>2 | 5.0 | 0.07<br>1 | 0.34 |      | 17.<br>8 | 0.25<br>7 | 203.6 | 0.26<br>2 |       |       | 7.1      | Wang et al. <sup>24</sup>  |                          |
| Loblolly pine | 450 | 80.<br>2 | 3.3 | 0.04<br>1 | 0.31 |      | 15.<br>8 | 0.19<br>7 | 258.6 | 0.20<br>0 |       |       | 7.6      | Wang et al. <sup>24</sup>  |                          |
| Citrus        | 600 | 78.<br>3 | 2.1 | 0.02<br>7 | 1.28 |      | 14.<br>9 | 0.19<br>0 | 61.2  | 0.20<br>7 | 182.0 | 0.010 | 9.5      | Wang et al. <sup>24</sup>  |                          |
| Loblolly pine | 600 | 85.<br>7 | 2.1 | 0.02<br>5 | 0.33 |      | 11.<br>4 | 0.13<br>3 | 259.6 | 0.13<br>7 |       |       | 7.1      | Wang et al. <sup>24</sup>  |                          |
| Rice husk     | 500 | 44.<br>8 | 2.2 | 0.04<br>5 | 0.62 | 0.02 |          |           | 80.5  |           | 182.4 | 0.110 | 39.7     | Zhang et al. <sup>25</sup> |                          |
| Rice husk     | 600 | 45.<br>7 | 1.7 | 0.03<br>3 | 0.52 | 0.07 |          |           | 98.1  |           | 297.4 | 0.150 | 43.5     | Zhang et al. <sup>25</sup> |                          |
| Rice husk     | 700 | 49.<br>8 | 1.2 | 0.02<br>4 | 0.50 | 0.06 |          |           | 100.1 |           | 192.6 | 0.110 | 44.8     | Zhang et al. <sup>25</sup> |                          |
| Rice husk     | 800 | 36.<br>7 | 0.9 | 0.01<br>8 | 0.43 | 0.03 |          |           | 116.7 |           | 174.4 | 0.090 | 46.6     | Zhang et al. <sup>25</sup> |                          |
| Rice husk     | 900 | 38.<br>3 | 0.7 | 0.01<br>5 | 0.41 | 0.09 |          |           | 115.2 |           | 160.4 | 0.100 | 48.1     | Zhang et al. <sup>25</sup> |                          |
| Crofton weed  | 400 | 62.<br>9 | 1.7 | 0.02<br>7 | 1.28 |      | 20.<br>6 | 0.32<br>7 | 49.2  | 0.34<br>7 |       |       | 10.<br>0 | 13.5                       | Fan et al. <sup>26</sup> |
| Crofton weed  | 500 | 65.<br>7 | 0.9 | 0.01<br>4 | 1.34 |      | 18.<br>0 | 0.27<br>4 | 49.0  | 0.29<br>4 |       |       | 10.<br>2 | 14.0                       | Fan et al. <sup>26</sup> |

|                                      |     |          |     |           |      |      |          |           |       |           |       |          |          |                                |                                |
|--------------------------------------|-----|----------|-----|-----------|------|------|----------|-----------|-------|-----------|-------|----------|----------|--------------------------------|--------------------------------|
| Crofton weed                         | 600 | 66.<br>8 | 0.6 | 0.01<br>0 | 1.12 |      | 16.<br>7 | 0.25<br>0 | 59.6  | 0.26<br>7 |       | 10.<br>3 | 14.8     | Fan et al. <sup>26</sup>       |                                |
| S. alterniflora<br>straw             | 400 | 52.<br>5 | 3.5 | 0.06<br>6 | 0.47 |      | 17.<br>1 | 0.32<br>5 | 111.7 | 0.33<br>4 |       |          |          | Wang et<br>al. <sup>27</sup>   |                                |
| P. australis<br>straw                | 350 | 64.<br>6 | 4.3 | 0.06<br>7 | 0.70 |      | 20.<br>0 | 0.31<br>0 | 92.2  | 0.32<br>1 |       |          |          | Wang et<br>al. <sup>27</sup>   |                                |
| S.alterniflora<br>straw              | 450 | 53.<br>1 | 2.9 | 0.05<br>4 | 0.43 |      | 16.<br>0 | 0.30<br>2 | 123.6 | 0.31<br>0 |       |          |          | Wang et<br>al. <sup>27</sup>   |                                |
| P. australis<br>straw                | 400 | 66.<br>3 | 3.7 | 0.05<br>5 | 0.68 |      | 18.<br>8 | 0.28<br>4 | 97.5  | 0.29<br>4 |       |          |          | Wang et<br>al. <sup>27</sup>   |                                |
| Sporobolus<br>alterniflorus<br>straw | 500 | 54.<br>5 | 2.4 | 0.04<br>3 | 0.43 |      | 11.<br>8 | 0.21<br>6 | 126.6 | 0.22<br>4 |       |          |          | Wang et<br>al. <sup>27</sup>   |                                |
| P. australis<br>straw                | 450 | 69.<br>3 | 3.3 | 0.04<br>8 | 0.58 |      | 13.<br>8 | 0.20<br>0 | 119.4 | 0.20<br>8 |       |          |          | Wang et<br>al. <sup>27</sup>   |                                |
| P. australis<br>straw                | 500 | 72.<br>2 | 3.0 | 0.04<br>1 | 0.67 |      | 9.2      | 0.12<br>7 | 107.7 | 0.13<br>7 |       |          |          | Wang et<br>al. <sup>27</sup>   |                                |
| Rice husk                            | 600 | 60.<br>0 | 1.6 | 0.02<br>7 | 0.84 | 0.02 |          |           | 71.4  |           | 152.4 | 0.080    | 30.5     | Qin et al. <sup>28</sup>       |                                |
| Rice husk                            | 700 | 59.<br>7 | 1.3 | 0.02<br>2 | 0.81 | 0.06 |          |           | 73.7  |           | 106.7 | 0.060    | 31.7     | Qin et al. <sup>28</sup>       |                                |
| Cottonseed hull                      | 200 | 48.<br>2 | 5.6 | 0.11<br>6 | 5.60 |      |          |           | 8.6   |           | 3.7   | 3.1      | 69.<br>3 | Spokas et<br>al. <sup>29</sup> |                                |
| Swine manure                         | 350 | 50.<br>8 | 5.0 | 0.09<br>8 | 3.74 |      |          |           | 13.6  |           | 0.9   | 8.1      | 32.3     | 46.<br>2                       | Spokas et<br>al. <sup>29</sup> |
| Distillers grain                     | 350 | 67.<br>4 | 4.7 | 0.07<br>0 | 7.40 |      |          |           | 9.1   |           | 0.3   | 6.8      | 11.3     | 43.<br>9                       | Spokas et<br>al. <sup>29</sup> |
| Pine wood chip                       | 350 | 74.<br>7 | 5.0 | 0.06<br>7 | 0.45 |      |          |           | 166.0 |           |       | 4.6      | 1.5      | 45.<br>2                       | Spokas et<br>al. <sup>29</sup> |
| Sugar cane<br>bagasse                | 350 | 75.<br>2 | 4.6 | 0.06<br>1 | 0.66 |      |          |           | 113.9 |           |       | 5.0      | 3.6      | 39.<br>2                       | Spokas et<br>al. <sup>29</sup> |

|                 |     |      |     |       |      |       |      |      |      |      |                             |
|-----------------|-----|------|-----|-------|------|-------|------|------|------|------|-----------------------------|
| Cottonseed hull | 350 | 71.5 | 4.2 | 0.059 | 4.20 | 17.0  | 4.7  | 6.6  | 5.7  | 34.9 | Spokas et al. <sup>29</sup> |
| Corn cob        | 450 | 76.5 | 4.2 | 0.055 | 0.70 | 109.3 |      | 8.7  | 2.8  | 32.2 | Spokas et al. <sup>29</sup> |
| Oak hardwood    | 538 | 53.4 | 2.6 | 0.049 | 0.40 | 133.5 | 33.7 | 9.8  | 27.1 | 32.5 | Spokas et al. <sup>29</sup> |
| Wood waste      | 500 | 68.7 | 3.3 | 0.048 | 0.10 | 687.0 | 66.3 | 5.0  | 4.6  | 33.6 | Spokas et al. <sup>29</sup> |
| Wood waste      | 400 | 76.9 | 3.6 | 0.047 | 0.80 | 96.1  | 3.5  | 6.9  | 3.5  | 25.8 | Spokas et al. <sup>29</sup> |
| Pine wood chip  | 465 | 71.0 | 3.3 | 0.046 | 0.20 | 355.0 | 0.1  | 6.8  | 9.0  | 72.3 | Spokas et al. <sup>29</sup> |
| Corn cob        | 600 | 80.1 | 3.7 | 0.046 | 0.60 | 133.5 |      | 9.0  | 3.7  | 24.0 | Spokas et al. <sup>29</sup> |
| Corn stover     | 500 | 25.0 | 1.1 | 0.044 | 0.60 | 41.7  | 4.2  | 8.9  | 69.0 | 41.3 | Spokas et al. <sup>29</sup> |
| Corn stover     | 410 | 42.0 | 1.8 | 0.043 | 1.00 | 42.0  | 2.2  |      | 54.0 |      | Spokas et al. <sup>29</sup> |
| Wood waste      | 450 | 77.9 | 3.1 | 0.040 | 0.70 | 111.3 | 26.8 | 8.4  | 3.6  | 22.8 | Spokas et al. <sup>29</sup> |
| Peanut hull     | 481 | 59.0 | 2.3 | 0.039 | 2.70 | 21.9  | 1.0  | 8.0  | 15.0 | 5.3  | Spokas et al. <sup>29</sup> |
| Corn stover     | 515 | 45.0 | 1.7 | 0.038 | 0.50 | 90.0  | 4.4  | 9.5  | 55.0 | 30.9 | Spokas et al. <sup>29</sup> |
| Wood pellets    | 650 | 77.2 | 2.9 | 0.038 | 0.30 | 257.3 |      | 9.8  | 6.0  | 11.7 | Spokas et al. <sup>29</sup> |
| Corn stover     | 505 | 46.0 | 1.5 | 0.033 | 1.20 | 38.3  | 17.3 | 10.0 | 54.0 | 13.8 | Spokas et al. <sup>29</sup> |
| Cottonseed hull | 500 | 78.7 | 2.5 | 0.032 | 2.50 | 31.5  |      | 8.5  | 7.9  | 18.6 | Spokas et al. <sup>29</sup> |

|                     |     |      |     |       |      |      |       |       |       |        |       |      |      |      |                                |
|---------------------|-----|------|-----|-------|------|------|-------|-------|-------|--------|-------|------|------|------|--------------------------------|
| Oak hardwood        | 550 | 56.0 | 0.9 | 0.016 | 0.20 |      |       | 280.0 | 116.8 |        |       | 10.5 | 42.2 | 4.4  | Spokas et al. <sup>29</sup>    |
| Cottonseed hull     | 650 | 84.4 | 1.2 | 0.014 | 1.20 |      |       | 70.3  | 34.0  |        |       | 8.6  | 8.3  | 13.3 | Spokas et al. <sup>29</sup>    |
| Oak hardwood        | 550 | 52.0 | 0.6 | 0.012 | 0.20 |      |       | 260.0 | 134.8 |        |       | 10.2 | 43.4 | 4.3  | Spokas et al. <sup>29</sup>    |
| Cottonseed hull     | 800 | 84.3 | 0.6 | 0.007 | 0.60 |      |       | 140.5 | 322.0 |        |       | 7.7  | 9.2  | 11.4 | Spokas et al. <sup>29</sup>    |
| Pine wood chip      | 500 | 73.3 |     |       | 0.20 |      |       | 366.5 |       |        |       | 7.2  | 2.3  | 45.8 | Spokas et al. <sup>29</sup>    |
| Oak hardwood        | 540 | 73.3 |     |       | 0.30 |      |       | 244.3 |       |        |       | 6.6  | 2.4  |      | Spokas et al. <sup>29</sup>    |
| Poultry litter      | 400 | 42.3 |     |       | 4.20 |      |       | 10.1  |       |        |       | 10.3 |      |      | Spokas et al. <sup>29</sup>    |
| Rice straw          | 800 | 58.1 | 1.4 | 0.023 | 1.09 | 12.2 | 0.210 | 53.3  | 0.229 | 205.0  |       | 12.3 |      | 20.4 | Chen et al. <sup>30</sup>      |
| Plant residues      | 700 | 68.8 | 1.3 | 0.019 | 1.08 | 25.9 | 0.376 | 63.7  | 0.392 | 1224.0 | 0.530 |      |      |      | Li et al. <sup>31</sup>        |
| Plant residues      | 600 | 60.3 | 2.4 | 0.040 | 0.93 | 19.6 | 0.325 | 64.9  | 0.341 | 758.0  | 0.300 |      |      |      | Li et al. <sup>31</sup>        |
| Plant residues      | 800 | 65.3 | 1.0 | 0.016 | 0.34 | 12.4 | 0.190 | 192.0 | 0.195 | 1079.0 | 0.500 |      |      |      | Li et al. <sup>31</sup>        |
| Plant residues      | 800 | 78.7 | 1.2 | 0.016 | 0.43 | 14.3 | 0.181 | 183.1 | 0.187 | 2482.0 | 0.890 |      |      |      | Li et al. <sup>31</sup>        |
| Wheat and rye straw | 400 | 69.1 | 3.9 | 0.056 | 0.28 |      |       | 246.8 |       | 4.5    |       | 8.4  | 10.6 |      | Wystalska et al. <sup>32</sup> |
| Beech wood chips    | 400 | 76.7 | 4.2 | 0.055 |      |      |       |       |       | 2.4    |       | 4.5  | 1.4  |      | Wystalska et al. <sup>32</sup> |
| Walnut shell        | 400 | 79.4 | 4.0 | 0.050 |      |      |       |       |       | 1.2    |       | 6.0  | 1.1  |      | Wystalska et al. <sup>32</sup> |

|                        |     |          |     |           |      |            |       |          |      |                                        |
|------------------------|-----|----------|-----|-----------|------|------------|-------|----------|------|----------------------------------------|
| Walnut shell           | 500 | 78.<br>0 | 3.2 | 0.04<br>1 |      |            | 9.1   | 6.9      | 2.0  | Wystalska<br>et al. <sup>32</sup>      |
| Wheat and rye<br>straw | 500 | 74.<br>4 | 3.0 | 0.04<br>0 | 0.32 | 232.5      | 13.0  | 9.5      | 11.6 | Wystalska<br>et al. <sup>32</sup>      |
| Beech wood<br>chips    | 500 | 82.<br>4 | 3.0 | 0.03<br>7 |      |            | 89.7  | 5.2      | 1.2  | Wystalska<br>et al. <sup>32</sup>      |
| Walnut shell           | 600 | 63.<br>2 | 2.2 | 0.03<br>5 |      |            | 164.5 | 7.4      | 2.6  | Wystalska<br>et al. <sup>32</sup>      |
| Wheat and rye<br>straw | 600 | 77.<br>3 | 2.3 | 0.03<br>0 | 0.65 | 119.0      | 8.7   | 9.9      | 13.9 | Wystalska<br>et al. <sup>32</sup>      |
| Beech wood<br>chips    | 600 | 88.<br>0 | 2.5 | 0.02<br>9 |      |            | 311.8 | 6.6      | 1.5  | Wystalska<br>et al. <sup>32</sup>      |
| Wheat and rye<br>straw | 700 | 78.<br>5 | 1.5 | 0.01<br>8 | 0.98 | 80.1       | 3.4   | 10.<br>1 | 14.4 | Wystalska<br>et al. <sup>32</sup>      |
| Walnut shell           | 700 | 77.<br>4 | 1.4 | 0.01<br>8 |      |            | 152.4 | 9.9      | 3.0  | Wystalska<br>et al. <sup>32</sup>      |
| Beech wood<br>chips    | 700 | 84.<br>6 | 1.5 | 0.01<br>7 |      |            | 362.2 | 7.8      | 1.6  | Wystalska<br>et al. <sup>32</sup>      |
| Canola straw           | 300 | 61.<br>6 |     |           | 0.19 | 324.2      |       | 6.5      | 10.7 | 199.<br>0 Yuan et<br>al. <sup>33</sup> |
| Canola straw           | 500 | 63.<br>4 |     |           | 0.04 | 1585.<br>0 |       | 9.4      | 18.1 | 210.<br>0 Yuan et<br>al. <sup>33</sup> |
| Canola straw           | 700 | 54.<br>9 |     |           | 0.04 | 1372.<br>5 |       | 10.<br>8 | 28.6 | 179.<br>0 Yuan et<br>al. <sup>33</sup> |
| Corn straw             | 300 | 53.<br>6 |     |           | 1.44 | 37.2       |       | 9.4      | 30.2 | 183.<br>0 Yuan et<br>al. <sup>33</sup> |
| Corn straw             | 500 | 41.<br>9 |     |           | 0.90 | 46.6       |       | 10.<br>8 | 50.7 | 304.<br>0 Yuan et<br>al. <sup>33</sup> |
| Corn straw             | 700 | 24.<br>5 |     |           | 0.78 | 31.4       |       | 11.<br>3 | 73.3 | 210.<br>0 Yuan et<br>al. <sup>33</sup> |



|               |     |          |     |           |      |          |           |       |           |       |          |      |           |                           |                         |
|---------------|-----|----------|-----|-----------|------|----------|-----------|-------|-----------|-------|----------|------|-----------|---------------------------|-------------------------|
| Soybean straw | 300 | 57.<br>6 |     |           | 1.27 |          |           | 45.4  |           |       | 7.7      | 11.2 | 279.<br>0 | Yuan et al. <sup>33</sup> |                         |
| Soybean straw | 500 | 62.<br>6 |     |           | 0.37 |          |           | 169.2 |           |       | 10.<br>9 | 17.9 | 216.<br>0 | Yuan et al. <sup>33</sup> |                         |
| Soybean straw | 700 | 57.<br>9 |     |           | 0.10 |          |           | 579.0 |           |       | 11.<br>1 | 23.7 | 222.<br>0 | Yuan et al. <sup>33</sup> |                         |
| Peanut straw  | 300 | 53.<br>7 |     |           | 2.60 |          |           | 20.7  |           |       | 8.6      | 20.1 | 229.<br>0 | Yuan et al. <sup>33</sup> |                         |
| Peanut straw  | 500 | 48.<br>5 |     |           | 1.51 |          |           | 32.1  |           |       | 10.<br>9 | 32.2 | 230.<br>0 | Yuan et al. <sup>33</sup> |                         |
| Peanut straw  | 700 | 47.<br>0 |     |           | 1.51 |          |           | 31.1  |           |       | 11.<br>2 | 38.5 | 254.<br>0 | Yuan et al. <sup>33</sup> |                         |
| Corn straw    | 700 | 76.<br>9 | 1.1 | 0.01<br>4 | 0.65 | 6.0      | 0.07<br>8 | 118.3 | 0.08<br>6 | 378.4 | 0.190    |      | 10.<br>2  | Zhao et al. <sup>34</sup> |                         |
| Switchgrass   | 400 | 67.<br>3 | 3.2 | 0.04<br>7 | 0.91 | 18.<br>7 | 0.27<br>7 | 73.9  | 0.29<br>1 |       |          |      | 27.<br>4  | Li et al. <sup>35</sup>   |                         |
| Biosolid      | 400 | 34.<br>0 | 1.4 | 0.04<br>0 | 2.17 | 8.5      | 0.25<br>1 | 15.7  | 0.31<br>5 |       |          |      | 26.<br>0  | Li et al. <sup>35</sup>   |                         |
| Switchgrass   | 600 | 73.<br>5 | 2.1 | 0.02<br>9 | 0.78 | 13.<br>2 | 0.17<br>9 | 94.2  | 0.19<br>0 |       |          |      | 11.<br>2  | 13.<br>7                  | Li et al. <sup>35</sup> |
| Biosolid      | 600 | 34.<br>7 | 1.0 | 0.02<br>7 | 1.74 | 5.8      | 0.16<br>8 | 19.9  | 0.21<br>8 |       |          |      | 10.<br>1  | 18.<br>1                  | Li et al. <sup>35</sup> |
| Switchgrass   | 800 | 74.<br>1 | 2.0 | 0.02<br>7 | 0.72 | 12.<br>2 | 0.16<br>5 | 102.9 | 0.17<br>5 |       |          |      | 11.<br>4  | 9.8                       | Li et al. <sup>35</sup> |
| Water oak     | 400 | 76.<br>4 | 2.8 | 0.03<br>6 | 0.63 | 12.<br>3 | 0.16<br>0 | 121.3 | 0.16<br>9 |       |          |      | 8.3       | 39.<br>4                  | Li et al. <sup>35</sup> |
| Biosolid      | 800 | 35.<br>9 | 0.8 | 0.02<br>3 | 1.58 | 5.0      | 0.13<br>9 | 22.7  | 0.18<br>3 |       |          |      | 10.<br>9  | 14.<br>9                  | Li et al. <sup>35</sup> |
| Water oak     | 600 | 80.<br>7 | 1.9 | 0.02<br>4 | 0.58 | 7.9      | 0.09<br>8 | 139.2 | 0.10<br>6 |       |          |      | 9.9       | 19.<br>9                  | Li et al. <sup>35</sup> |

|                       |     |      |     |       |      |      |       |       |       |       |       |                           |                                |
|-----------------------|-----|------|-----|-------|------|------|-------|-------|-------|-------|-------|---------------------------|--------------------------------|
| Water oak             | 800 | 82.0 | 1.8 | 0.022 | 0.59 | 6.5  | 0.079 | 139.1 | 0.087 | 10.2  | 11.2  | Li et al. <sup>35</sup>   |                                |
| Pine needle           | 300 | 68.9 | 4.3 | 0.063 | 1.08 | 25.7 | 0.374 | 63.8  | 0.389 | 19.9  | 1.9   | Chen et al. <sup>36</sup> |                                |
| Pine needle           | 400 | 77.9 | 3.0 | 0.038 | 1.16 | 18.0 | 0.232 | 67.1  | 0.247 | 112.4 | 0.044 | 2.3                       | Chen et al. <sup>36</sup>      |
| Pine needle           | 500 | 81.7 | 2.3 | 0.028 | 1.11 | 15.0 | 0.183 | 73.6  | 0.197 | 236.4 | 0.095 | 2.8                       | Chen et al. <sup>36</sup>      |
| Pine needle           | 700 | 79.8 | 1.3 | 0.016 | 1.13 | 11.1 | 0.139 | 70.6  | 0.153 | 490.8 | 0.186 | 2.2                       | Chen et al. <sup>36</sup>      |
| Pine needle           | 600 | 85.4 | 1.9 | 0.022 | 0.98 | 11.8 | 0.138 | 87.1  | 0.150 | 206.7 | 0.076 | 2.8                       | Chen et al. <sup>36</sup>      |
| Tomato plant waste    | 400 | 70.2 | 0.3 | 0.005 | 1.50 | 27.9 | 0.398 | 46.8  | 0.419 | 8.8   | 37.4  | 9.2                       | Abdulelah et al. <sup>37</sup> |
| Date palm fiber       | 500 | 71.7 | 0.1 | 0.001 |      | 28.2 | 0.393 |       |       | 8.8   | 31.4  | 1.5                       | Abdulelah et al. <sup>37</sup> |
| Tomato plant waste    | 500 | 74.5 | 0.1 | 0.001 | 0.12 | 25.3 | 0.339 | 620.9 | 0.341 | 10.2  | 35.8  | 12.0                      | Abdulelah et al. <sup>37</sup> |
| Chicken feather waste | 300 | 51.5 | 8.8 | 0.171 | 23.0 | 16.7 | 0.324 | 2.2   | 0.771 | 8.0   | 40.2  | 0.2                       | Abdulelah et al. <sup>37</sup> |
| Date palm leaf        | 300 | 74.2 | 4.4 | 0.060 | 0.64 | 20.7 | 0.279 | 115.9 | 0.288 | 7.6   | 28.8  | 2.3                       | Abdulelah et al. <sup>37</sup> |
| Cucumber plant waste  | 400 | 77.7 | 0.3 | 0.004 | 0.70 | 21.3 | 0.274 | 110.9 | 0.283 | 9.9   | 57.9  | 8.6                       | Abdulelah et al. <sup>37</sup> |
| Date palm petiole     | 500 | 78.7 | 0.2 | 0.003 |      | 21.1 | 0.268 |       |       | 9.4   | 19.1  | 4.6                       | Abdulelah et al. <sup>37</sup> |
| Date palm leaf        | 400 | 79.4 | 0.9 | 0.011 | 0.44 | 19.3 | 0.243 | 180.4 | 0.249 | 9.0   | 24.1  | 2.7                       | Abdulelah et al. <sup>37</sup> |
| Cow dung              | 600 | 79.5 | 0.0 | 0.000 | 1.38 | 19.1 | 0.240 | 57.6  | 0.258 | 11.1  | 38.3  | 6.0                       | Abdulelah et al. <sup>37</sup> |

|                       |     |      |     |      |   |      |      |      |   |       |      |   |      |      |      |                                |
|-----------------------|-----|------|-----|------|---|------|------|------|---|-------|------|---|------|------|------|--------------------------------|
| Cucumber plant waste  | 500 | 80.5 | 0.1 | 0.00 | 1 | 0.12 | 19.3 | 0.24 | 0 | 671.0 | 0.24 | 1 | 10.3 | 55.5 | 9.4  | Abdulelah et al. <sup>37</sup> |
| Poultry litter        | 500 | 80.1 | 0.1 | 0.00 | 1 | 2.54 | 17.3 | 0.21 | 6 | 31.5  | 0.24 | 8 | 10.5 | 49.9 | 4.3  | Abdulelah et al. <sup>37</sup> |
| Chicken feather waste | 400 | 59.9 | 6.1 | 0.10 | 1 | 21.0 | 12.9 | 0.21 | 6 | 2.8   | 0.56 | 8 | 7.9  | 39.4 | 0.3  | Abdulelah et al. <sup>37</sup> |
| Date palm petiole     | 600 | 84.6 | 0.0 | 0.00 | 0 |      | 15.4 | 0.18 | 2 |       |      |   | 10.1 | 20.6 | 5.4  | Abdulelah et al. <sup>37</sup> |
| Poultry litter        | 600 | 85.3 | 0.1 | 0.00 | 1 | 0.92 | 13.7 | 0.16 | 0 | 92.8  | 0.17 | 1 | 10.8 | 51.9 | 5.0  | Abdulelah et al. <sup>37</sup> |
| Date palm leaf        | 500 | 86.3 | 0.1 | 0.00 | 1 |      | 13.6 | 0.15 | 8 |       |      |   | 9.7  | 27.6 | 3.3  | Abdulelah et al. <sup>37</sup> |
| Conocarpus            | 600 | 86.7 | 0.0 | 0.00 | 0 |      | 13.3 | 0.15 | 3 |       |      |   | 10.5 | 26.9 | 4.1  | Abdulelah et al. <sup>37</sup> |
| Date palm leaf        | 600 | 91.1 | 0.1 | 0.00 | 1 |      | 8.9  | 0.09 | 7 |       |      |   | 10.3 | 27.6 | 7.2  | Abdulelah et al. <sup>37</sup> |
| Date palm fiber       | 600 | 91.4 | 0.0 | 0.00 | 0 | 0.43 | 8.1  | 0.08 | 9 | 212.7 | 0.09 | 3 | 10.1 | 39.7 | 3.4  | Abdulelah et al. <sup>37</sup> |
| Tomato plant waste    | 600 | 92.7 | 0.0 | 0.00 | 0 |      | 7.2  | 0.07 | 8 |       |      |   | 10.6 | 42.4 | 12.0 | Abdulelah et al. <sup>37</sup> |
| Cucumber plant waste  | 600 | 95.2 | 0.0 | 0.00 | 0 |      | 4.8  | 0.05 | 0 |       |      |   | 11.0 | 59.2 | 10.0 | Abdulelah et al. <sup>37</sup> |
| Chicken feather waste | 500 | 67.0 | 1.0 | 0.01 | 5 | 28.9 | 3.0  | 0.04 | 5 | 2.3   | 0.47 | 7 | 8.2  | 43.1 | 0.5  | Abdulelah et al. <sup>37</sup> |
| Chicken feather waste | 600 | 72.0 | 0.1 | 0.00 | 1 | 25.3 | 2.6  | 0.03 | 7 | 2.8   | 0.38 | 8 | 8.4  | 46.1 | 0.5  | Abdulelah et al. <sup>37</sup> |

#### Abbreviations:

C: carbon; H: hydrogen; N: nitrogen; S: sulfur; O: oxygen; S.A: surface area; TPV: total pore volume; VM: volatile matter; EC=electrical conductivity, CEC=cation exchange capacity

**Table S2. Some plant growth-promoting bacteria (PGPB) and their impacts on phytoremediation of organic pollutants**

| Organic pollutant(s)                                | Plant(s)                                   | PGPB                                                                                                                                                                 | Specific attributes and contribution of bacterial inoculant(s)                                                                                                                                                                                                                                    | References                   |
|-----------------------------------------------------|--------------------------------------------|----------------------------------------------------------------------------------------------------------------------------------------------------------------------|---------------------------------------------------------------------------------------------------------------------------------------------------------------------------------------------------------------------------------------------------------------------------------------------------|------------------------------|
| Pyrene                                              | Rice                                       | <i>Klebsiella pneumoniae</i> AWD5, <i>Alcaligenes faecalis</i> BDB4, <i>Pseudomonas fragi</i> DBC, <i>Pseudomonas aeruginosa</i> PDB1, <i>Acinetobacter</i> sp. PDB4 | <ul style="list-style-type: none"><li>• Promotion of rice growth in pyrene-contaminated soil.</li><li>• Pyrene degradation.</li><li>• Stimulation of stress response through glutathione mediated reaction.</li></ul>                                                                             | Singha et al. <sup>38</sup>  |
| 16 priority polycyclic aromatic hydrocarbons (PAHs) | Alfalfa                                    | <i>Rhizobium meliloti</i>                                                                                                                                            | <ul style="list-style-type: none"><li>• Stimulation of rhizomicrobiome to degrade PAHs in soil.</li><li>• Plant growth-promoting activities.</li><li>• Direct degradation of PAHs.</li></ul>                                                                                                      | Teng et al. <sup>39</sup>    |
| Chrysene                                            | White clover ( <i>Trifolium repens</i> L.) | <i>Rhizobium leguminosarum</i> bv. <i>trifolii</i>                                                                                                                   | <ul style="list-style-type: none"><li>• Enhanced dissipation of chrysene in soil.</li><li>• Stimulated rhizomicrobiome to degrade chrysene.</li><li>• Improved plant vigor and growth in chrysene polluted soil.</li></ul>                                                                        | Johnson et al. <sup>40</sup> |
| Polychlorinated biphenyls (PCBs)                    | Alfalfa                                    | <i>Rhizobium meliloti</i>                                                                                                                                            | <ul style="list-style-type: none"><li>• Stimulated rhizosphere microflora for effective PCB degradation.</li><li>• Increased accumulation of PCBs in plant roots and shoots.</li></ul>                                                                                                            | Xu et al. <sup>41</sup>      |
| PCBs                                                | <i>Phalaris arundinacea</i>                | <i>Rhodococcus</i> sp.                                                                                                                                               | <ul style="list-style-type: none"><li>• Degradation of PCB congeners.</li><li>• Promotion of lateral root emergence.</li><li>• Increased plant biomass in PCB contaminated soil.</li><li>• Production of 1-aminocyclopropane-1-carboxylate deaminase, which can alleviate plant stress.</li></ul> | Vergani et al. <sup>42</sup> |

|                                                           |                                                                         |                                                               |                                                                                                                                                                                                                                                                                                             |                                  |
|-----------------------------------------------------------|-------------------------------------------------------------------------|---------------------------------------------------------------|-------------------------------------------------------------------------------------------------------------------------------------------------------------------------------------------------------------------------------------------------------------------------------------------------------------|----------------------------------|
| PCBs                                                      | Maize<br>( <i>Zea mays</i><br><i>L.</i> )                               | <i>Pseudomonas</i> spp. S5<br>and <i>Alcaligenes faecalis</i> | <ul style="list-style-type: none"> <li>• Stimulated degradation of the PCBs in the soil.</li> <li>• The partnership between <i>Pseudomonas</i> spp. S5 and maize led to adequate PCB removal from the soil.</li> <li>• Improved both maize growth and PCB degradation.</li> </ul>                           | Salimizadeh et al. <sup>43</sup> |
| Phenolic pollutants                                       | <i>Arabidopsis thaliana</i><br>and<br>vetiver                           | <i>Achromobacter xylooxidans</i>                              | <ul style="list-style-type: none"> <li>• Induced extension of root lengths and fresh weights for effective removal of pollutants.</li> <li>• Helped plants to tolerate stress from aromatic compounds.</li> <li>• Improved phytoremediation of phenolic pollutants in hydroponic and soil tests.</li> </ul> | Ho et al. <sup>44</sup>          |
| Trichloroethylene (TCE)                                   | Poplar                                                                  | <i>Pseudomonas putida</i><br>W619-TC                          | <ul style="list-style-type: none"> <li>• Promotion of plant growth.</li> <li>• Reduction of TCE phytotoxicity.</li> <li>• Degradation of TCE in the leaves.</li> </ul>                                                                                                                                      | Weyens et al. <sup>45</sup>      |
| Pentachlorophenol (PCP)                                   | Chinese chive<br>( <i>Allium tuberosum</i><br><i>Rottler</i> )          | <i>Pseudomonas gladioli</i><br>M-2196                         | <ul style="list-style-type: none"> <li>• Degradation of PCB.</li> <li>• Promotion of Plant Growth.</li> <li>• Stimulated plant excretion of root exudates, which influenced PCP-degrading rhizomicrobiome in the soil.</li> </ul>                                                                           | Nakamura et al. <sup>46</sup>    |
| Dichlorodiphenyltrichloroethane (DDT)                     | Perennial ryegrass<br>and tall fescue                                   | <i>Pseudomonas</i> sp. SB                                     | <ul style="list-style-type: none"> <li>• Production of biosurfactants.</li> <li>• Increased the bioavailability of DDT.</li> <li>• Enhanced microbial degradation of DDT in soil.</li> <li>• Assisted plants effectively in removing DDT from the soil.</li> </ul>                                          | Wang et al. <sup>47</sup>        |
| Naphthalene, phenanthrene, fluorene, and dibenzothiophene | Hybrid poplar<br>( <i>Populus deltoides</i><br>× <i>Populus nigra</i> ) | <i>Burkholderia fungorum</i><br>DBT1                          | <ul style="list-style-type: none"> <li>• Degradation of PAHs in soil.</li> <li>• Enhanced plant tolerance against the toxic effects of PAHs.</li> </ul>                                                                                                                                                     | Andreolli et al. <sup>48</sup>   |

**Table S3. Effects of different types of biochar on organic pollutants in different types of contaminated soil**

| Feedstock   | Pyrolysis temperature | Modification/supplementation | Application rate (mass ratio, %)                                         | Pollutants                        | Soil texture and pH                                     | Plants/microorganisms                                                              | Key mechanisms | findings/Main                                                                                                                                                                                                                                                                                                                                               | References                  |
|-------------|-----------------------|------------------------------|--------------------------------------------------------------------------|-----------------------------------|---------------------------------------------------------|------------------------------------------------------------------------------------|----------------|-------------------------------------------------------------------------------------------------------------------------------------------------------------------------------------------------------------------------------------------------------------------------------------------------------------------------------------------------------------|-----------------------------|
| Wheat straw | 450 °C                | Ball milling                 | 1%, 2%, and 5%                                                           | Dimethyl phthalate                | Silty clay loam, pH=8.4                                 |                                                                                    |                | Ball-milling contributed to the formation of biochar-soil composites, which, in turn, enhanced the sorption of dimethyl phthalate through chemisorption and physisorption                                                                                                                                                                                   | Yan and Quan. <sup>49</sup> |
| Maize straw | 500 °C                | Oxalic acid                  | 1% biochar, 0, 0.5 or 20 mg kg <sup>-1</sup> of oxalic acid + 1% biochar | PAHs                              |                                                         | Ryegrass ( <i>Lolium multiflorum Lam</i> )                                         |                | The combination of biochar and oxalic acid, the main component of ryegrass root exudates, significantly improved the removal of high and low ring PAHs from the tested soil, in particular by enhancing the proliferation and functional activity of microbial communities associated with PAH degradation.                                                 | Li et al. <sup>50</sup>     |
| Corn cob    | 500 °C                |                              | 3%                                                                       | Petroleum hydrocarbons and Nickel | Sand (17.99 %), silt (34.00 %), clay (48.01%), pH= 7.26 | Nickel-resistant and hydrocarbon-degrading bacterial strain <i>Citrobacter</i> sp. |                | Biochar-based bacterial inoculant (BBI) lowered soil pH, in particular through the production of organic acids as a result of the degradation of oil pollutants by indigenous and exogenous microorganisms. Biochar enhanced adaptability and functionality of bacterial inoculant in co-contaminated soil. The efficiency of degradation of oil pollutants | Li et al. <sup>51</sup>     |

by BBI (45.52%) was significantly higher than that of the free bacterial inoculant (30.15%), biochar (25.92%), and control (18.47%). Oil pollutants were removed more efficiently by BBI (45.52 %) than by free bacterial inoculant (30.15 %), biochar (25.92 %), and control (18.47 %).

|                                                          |                |    |                                                      |                                                                                                                          |                                                                             |                                                                                                                                                                                                                                                                                                                                   |                           |
|----------------------------------------------------------|----------------|----|------------------------------------------------------|--------------------------------------------------------------------------------------------------------------------------|-----------------------------------------------------------------------------|-----------------------------------------------------------------------------------------------------------------------------------------------------------------------------------------------------------------------------------------------------------------------------------------------------------------------------------|---------------------------|
| Sawdust (SD) and wheat straw (WS)                        | 300 and 500 °C | 5% | 16 priority PAHs                                     | Sand (24%), coarse silt (30%), coarse clay (14%), fine silt (22%), and fine clay (10%), pH= 7.61                         |                                                                             | Biochar amendment resulted in the proliferation of PAH-degrading communities. Biochar produced at a high temperature (500 °C) considerably decreased PAHs compared to biochar produced at a lower temperature (300 °C), in part owing to enhanced porosity and surface area available to support degrading microbial populations. | Kong et al. <sup>52</sup> |
| Wheat straw and pine needle (PN)                         | 550 °C         | 2% | PCBs                                                 | Two Alfisols: Sand (4.2%), silt (83.2%) and clay (12.6%), pH: 6.3. Sand (12.0%), silt (66.9%) and clay (21.1%), pH= 6.1. | Pakchoi ( <i>Brassica chinensis</i> L.) and carrot ( <i>Daucus carota</i> ) | PCB uptake by plants decreased significantly after the addition of biochar, especially due to the adsorption of PCBs by biochar.                                                                                                                                                                                                  | Wang et al. <sup>53</sup> |
| Cow manure, peanut shells, <i>Salsola collina</i> Pall., | 500°C          | 2% | Tetracycline, oxytetracycline, and chlortetracycline | pH=8.73                                                                                                                  |                                                                             | Amendment of biochar, notably from cow manure, improved the removal of antibiotics, mostly by                                                                                                                                                                                                                                     | Yue et al. <sup>54</sup>  |

|                                                                                   |        |                                                 |                                     |                                                   |                                                       |                                           |  |                                                                                                                                                                                                                                                                                                                           |                            |
|-----------------------------------------------------------------------------------|--------|-------------------------------------------------|-------------------------------------|---------------------------------------------------|-------------------------------------------------------|-------------------------------------------|--|---------------------------------------------------------------------------------------------------------------------------------------------------------------------------------------------------------------------------------------------------------------------------------------------------------------------------|----------------------------|
| <i>Firmiana<br/>platanifolia</i><br>Sawdust, and<br><i>Suaeda<br/>salsa</i> Pall. |        |                                                 |                                     |                                                   |                                                       |                                           |  | boosting pollutant<br>accessibilities to degrading<br>microorganisms via the<br>elevation of electrical<br>conductivity. Biochar also<br>improved soil properties,<br>which in turn increased<br>microbial degradation of<br>pollutants in the soil.                                                                      |                            |
| Blended wood chips                                                                | 450 °C |                                                 | 0 % and 1.5 %                       | Thiamethoxam                                      | pH = 6.78                                             | Chinese chive ( <i>Allium tuberosum</i> ) |  | The uptake of thiamethoxam and its metabolite clothianidin by Chinese chives decreased by 22.8% and 37.6% after the addition of biochar, respectively. On the other hand, the half-life of thiamethoxam in soil increased from 89.4 to 120 days, suggesting that biochar increased its persistence in soil.               | You et al. <sup>55</sup>   |
| Maize straw                                                                       | 300 °C | Combination with maize straw-pig manure compost | 2% biochar, 1% biochar + 1% compost | 2,2',4,4'-tetrabrominated diphenyl ether (BDE-47) | Clay (32.8%), silt (56.8%) and sand (10.4%), pH: 7.43 | Carrot ( <i>Daucus carota</i> L.)         |  | Immobilization of BDE-47 by biochar reduced pollutant bioavailability in soil. The application of only 2% biochar inhibited the degradation of BDE-47 in soil. The combined application of compost and biochar stimulated the microbial degradation of BDE-47 in the soil and significantly reduced its uptake by plants. | Xiang et al. <sup>56</sup> |



## References

1. Wang, Y.; Tang, Y.; Jiang, Q.; Zhang, X.; Xie, W.; Li, R.; Liu, W.; Kang, J.; Zhang, Y., Alleviation of atrazine toxicity to maize seedlings grown in soils with amendment of biochar derived from wheat under different temperatures. *Environ Sci Pollut Res Int* **2019**, *26*, (24), 24362-24371.
2. Chojnacki, J.; Kielar, J.; Kukielka, L.; Najser, T.; Pachuta, A.; Berner, B.; Zdanowicz, A.; Frantík, J.; Najser, J.; Peer, V., Batch Pyrolysis and Co-Pyrolysis of Beet Pulp and Wheat Straw. *Materials* **2022**, *15*, (3), 1230.
3. Liu, Z.; Huang, K.; Zhang, Y.; Tian, D.; Huang, M.; He, J.; Zou, J.; Zhao, L.; Shen, F., Biochar produced by combining lignocellulosic feedstock and mushroom reduces its heterogeneity. *Bioresour Technol* **2022**, *355*, 127231.
4. Siatecka, A.; Różyło, K.; Ok, Y. S.; Oleszczuk, P., Biochars ages differently depending on the feedstock used for their production: Willow-versus sewage sludge-derived biochars. *Science of The Total Environment* **2021**, *789*, 147458.
5. Zhu, K.; Wang, X.; Geng, M.; Chen, D.; Lin, H.; Zhang, H., Catalytic oxidation of clofibric acid by peroxydisulfate activated with wood-based biochar: Effect of biochar pyrolysis temperature, performance and mechanism. *Chemical Engineering Journal* **2019**, *374*, 1253-1263.
6. Li, L. P.; Liu, Y. H.; Ren, D.; Wang, J. J., Characteristics and chlorine reactivity of biochar-derived dissolved organic matter: Effects of feedstock type and pyrolysis temperature. *Water Res* **2022**, *211*, 118044.
7. Das, S. K.; Ghosh, G. K.; Avasthe, R.; Sinha, K., Compositional heterogeneity of different biochar: effect of pyrolysis temperature and feedstocks. *Journal of Environmental Management* **2021**, *278*, 111501.
8. Pérez-Guzmán, L.; Lower, B. H.; Dick, R. P., Corn and hardwood biochars affected soil microbial community and enzyme activities. *Agrosystems, Geosciences & Environment* **2020**, *3*, (1), e20082.
9. Oginni, O.; Singh, K., Effect of carbonization temperature on fuel and caffeine adsorption characteristics of white pine and Norway spruce needle derived biochars. *Industrial Crops and Products* **2021**, *162*, 113261.
10. Li, M.; Tang, Y.; Ren, N.; Zhang, Z.; Cao, Y., Effect of mineral constituents on temperature-dependent structural characterization of carbon fractions in sewage sludge-derived biochar. *Journal of Cleaner Production* **2018**, *172*, 3342-3350.
11. Huang, H.; Yao, W.; Li, R.; Ali, A.; Du, J.; Guo, D.; Xiao, R.; Guo, Z.; Zhang, Z.; Awasthi, M. K., Effect of pyrolysis temperature on chemical form, behavior and environmental risk of Zn, Pb and Cd in biochar produced from phytoremediation residue. *Bioresour Technol* **2018**, *249*, 487-493.
12. Yang, T.; Meng, J.; Jeyakumar, P.; Cao, T.; Liu, Z.; He, T.; Cao, X.; Chen, W.; Wang, H., Effect of pyrolysis temperature on the bioavailability of heavy metals in rice straw-derived biochar. *Environmental Science and Pollution Research* **2021**, *28*, (2), 2198-2208.

13. Vaghela, D. R.; Pawar, A.; Sharma, D., Effectiveness of Wheat Straw Biochar in Aqueous Zn Removal: Correlation with Biochar Characteristics and Optimization of Process Parameters. *BioEnergy Research* **2022**, 1-15.
14. Tag, A. T.; Duman, G.; Ucar, S.; Yanik, J., Effects of feedstock type and pyrolysis temperature on potential applications of biochar. *Journal of Analytical and Applied Pyrolysis* **2016**, *120*, 200-206.
15. Dhar, S. A.; Sakib, T. U.; Hilary, L. N., Effects of pyrolysis temperature on production and physicochemical characterization of biochar derived from coconut fiber biomass through slow pyrolysis process. *Biomass Conversion and Biorefinery* **2020**, 1-17.
16. Rittl, T. F.; Butterbach-Bahl, K.; Basile, C. M.; Pereira, L. A.; Alms, V.; Dannenmann, M.; Couto, E. G.; Cerri, C. E., Greenhouse gas emissions from soil amended with agricultural residue biochars: Effects of feedstock type, production temperature and soil moisture. *Biomass and Bioenergy* **2018**, *117*, 1-9.
17. Bose, R. S.; Zakaria, B. S.; Tiwari, M. K.; Dhar, B. R., High-rate blackwater anaerobic digestion under septic tank conditions with the amendment of biosolids-derived biochar synthesized at different temperatures. *Bioresource Technology* **2021**, *331*, 125052.
18. Cantrell, K. B.; Hunt, P. G.; Uchimiya, M.; Novak, J. M.; Ro, K. S., Impact of pyrolysis temperature and manure source on physicochemical characteristics of biochar. *Bioresource technology* **2012**, *107*, 419-428.
19. Chaves Fernandes, B. C.; Ferreira Mendes, K.; Dias Júnior, A. F.; da Silva Caldeira, V. P.; da Silva Teófilo, T. M.; Severo Silva, T.; Mendonça, V.; de Freitas Souza, M.; Valadão Silva, D., Impact of pyrolysis temperature on the properties of eucalyptus wood-derived biochar. *Materials* **2020**, *13*, (24), 5841.
20. Cao, Y.; Shen, G.; Zhang, Y.; Gao, C.; Li, Y.; Zhang, P.; Xiao, W.; Han, L., Impacts of carbonization temperature on the Pb(II) adsorption by wheat straw-derived biochar and related mechanism. *Sci Total Environ* **2019**, *692*, 479-489.
21. Xu, Y.; Bai, T.; Li, Q.; Yang, H.; Yan, Y.; Sarkar, B.; Lam, S. S.; Bolan, N., Influence of pyrolysis temperature on the characteristics and lead(II) adsorption capacity of phosphorus-engineered poplar sawdust biochar. *Journal of Analytical and Applied Pyrolysis* **2021**, *154*.
22. Kabir, G.; Mohammed, I. Y.; Abakr, Y. A.; Hameed, B. H., Intermediate Pyrolysis of Desert Date Shell for Conversion to High-Quality Biomaterial Resources. *Chemical Engineering & Technology* **2022**.
23. Kubaczyński, A.; Walkiewicz, A.; Pytlak, A.; Brzezińska, M., New biochars from raspberry and potato stems absorb more methane than wood offcuts and sunflower husk biochars. *International Agrophysics* **2020**, *34*, (3), 355-364.
24. Wang, S.; Gao, B.; Zimmerman, A. R.; Li, Y.; Ma, L.; Harris, W. G.; Migliaccio, K. W., Physicochemical and sorptive properties of biochars derived from woody and herbaceous biomass. *Chemosphere* **2015**, *134*, 257-62.
25. Zhang, Q.; Zhang, D.; Lu, W.; Khan, M. U.; Xu, H.; Yi, W.; Lei, H.; Huo, E.; Qian, M.; Zhao, Y.; Zou, R., Production of high-density polyethylene biocomposites from rice husk biochar: Effects of varying pyrolysis temperature. *Sci Total Environ* **2020**, *738*, 139910.

26. Fan, L.; Zhou, X.; Liu, Q.; Wan, Y.; Cai, J.; Chen, W.; Chen, F.; Ji, L.; Cheng, L.; Luo, H., Properties of Eupatorium adenophora Spreng (crofton weed) biochar produced at different pyrolysis temperatures. *Environmental Engineering Science* **2019**, *36*, (8), 937-946.
27. Wang, W.; Bai, J.; Lu, Q.; Zhang, G.; Wang, D.; Jia, J.; Guan, Y.; Yu, L., Pyrolysis temperature and feedstock alter the functional groups and carbon sequestration potential of Phragmites australis-and Spartina alterniflora-derived biochars. *GCB Bioenergy* **2021**, *13*, (3), 493-506.
28. Qin, J.; Chen, Q.; Sun, M.; Sun, P.; Shen, G., Pyrolysis temperature-induced changes in the catalytic characteristics of rice husk-derived biochar during 1,3-dichloropropene degradation. *Chemical Engineering Journal* **2017**, *330*, 804-812.
29. Spokas, K. A.; Novak, J. M.; Stewart, C. E.; Cantrell, K. B.; Uchimiya, M.; Dusaire, M. G.; Ro, K. S., Qualitative analysis of volatile organic compounds on biochar. *Chemosphere* **2011**, *85*, (5), 869-82.
30. Chen, G.; Zhang, Z.; Zhang, Z.; Zhang, R., Redox-active reactions in denitrification provided by biochars pyrolyzed at different temperatures. *Sci Total Environ* **2018**, *615*, 1547-1556.
31. Li, K.; Niu, X.; Zhang, D.; Guo, H.; Zhu, X.; Yin, H.; Lin, Z.; Fu, M., Renewable biochar derived from mixed sewage sludge and pine sawdust for carbon dioxide capture. *Environ Pollut* **2022**, *306*, 119399.
32. Wyslaska, K.; Kwarciak-Kozłowska, A., The Effect of Biodegradable Waste Pyrolysis Temperatures on Selected Biochar Properties. *Materials (Basel)* **2021**, *14*, (7).
33. Yuan, J. H.; Xu, R. K.; Zhang, H., The forms of alkalis in the biochar produced from crop residues at different temperatures. *Bioresour Technol* **2011**, *102*, (3), 3488-97.
34. Zhao, B.; Li, L.; Zhao, Y.; Zhang, X., Thermal conductivity of a Brown Earth soil as affected by biochars derived at different temperatures: Experiment and prediction with the Campbell model. *International Agrophysics* **2020**, *34*, (4), 433-439.
35. Li, S.; Chen, G., Thermogravimetric, thermochemical, and infrared spectral characterization of feedstocks and biochar derived at different pyrolysis temperatures. *Waste Manag* **2018**, *78*, 198-207.
36. Chen, B.; Zhou, D.; Zhu, L., Transitional adsorption and partition of nonpolar and polar aromatic contaminants by biochars of pine needles with different pyrolytic temperatures. *Environmental science & technology* **2008**, *42*, (14), 5137-5143.
37. Almutairi, A. A.; Ahmad, M.; Rafique, M. I.; Al-Wabel, M. I., Variations in composition and stability of biochars derived from different feedstock types at varying pyrolysis temperature. *Journal of the Saudi Society of Agricultural Sciences* **2022**.
38. Singha, L. P.; Sinha, N.; Pandey, P., Rhizoremediation prospects of polyaromatic hydrocarbon degrading rhizobacteria, that facilitate glutathione and glutathione-S-transferase mediated stress response, and enhance growth of rice plants in pyrene contaminated soil. *Ecotoxicology and Environmental Safety* **2018**, *164*, 579-588.
39. Teng, Y.; Shen, Y.; Luo, Y.; Sun, X.; Sun, M.; Fu, D.; Li, Z.; Christie, P., Influence of Rhizobium meliloti on phytoremediation of polycyclic aromatic hydrocarbons by alfalfa in an aged contaminated soil. *Journal of hazardous materials* **2011**, *186*, (2-3), 1271-1276.
40. Johnson, D.; Maguire, K.; Anderson, D.; McGrath, S., Enhanced dissipation of chrysene in planted soil: the impact of a rhizobial inoculum. *Soil biology and biochemistry* **2004**, *36*, (1), 33-38.
41. Xu, L.; Teng, Y.; Luo, Y.-M.; Li, Z.-G., Effects of Rhizobium meliloti on PCBs degradation and transformation in solution culture. *Huan Jing ke Xue= Huanjing Kexue* **2010**, *31*, (1), 255-259.
42. Vergani, L.; Mapelli, F.; Suman, J.; Cajthaml, T.; Uhlik, O.; Borin, S., Novel PCB-degrading Rhodococcus strains able to promote plant growth for assisted rhizoremediation of historically polluted soils. *PloS one* **2019**, *14*, (8), e0221253.
43. Salimizadeh, M.; Shirvani, M.; Shariatmadari, H.; Nikaeen, M.; Leili Mohebi Nozar, S., Coupling of bioaugmentation and phytoremediation to improve PCBs removal from a transformer oil-contaminated soil. *International journal of phytoremediation* **2018**, *20*, (7), 658-665.
44. Ho, Y.-N.; Mathew, D. C.; Hsiao, S.-C.; Shih, C.-H.; Chien, M.-F.; Chiang, H.-M.; Huang, C.-C., Selection and application of endophytic bacterium Achromobacter xylosoxidans strain F3B for improving phytoremediation of phenolic pollutants. *Journal of Hazardous Materials* **2012**, *219*, 43-49.
45. Weyens, N.; Truyens, S.; Dupae, J.; Newman, L.; Taghavi, S.; van der Lelie, D.; Carleer, R.; Vangronsveld, J., Potential of the TCE-degrading endophyte Pseudomonas putida W619-TCE to improve plant growth and reduce TCE phytotoxicity and evapotranspiration in poplar cuttings. *Environmental Pollution* **2010**, *158*, (9), 2915-2919.
46. Nakamura, T.; Motoyama, T.; Suzuki, Y.; Yamaguchi, I., Biotransformation of pentachlorophenol by Chinese chive and a recombinant derivative of its rhizosphere-competent microorganism, Pseudomonas gladioli M-2196. *Soil Biology and Biochemistry* **2004**, *36*, (5), 787-795.
47. Wang, B.; Wang, Q.; Liu, W.; Liu, X.; Hou, J.; Teng, Y.; Luo, Y.; Christie, P., Biosurfactant-producing microorganism Pseudomonas sp. SB assists the phytoremediation of DDT-contaminated soil by two grass species. *Chemosphere* **2017**, *182*, 137-142.
48. Andreolli, M.; Lampis, S.; Poli, M.; Gullner, G.; Biró, B.; Vallini, G., Endophytic Burkholderia fungorum DBT1 can improve phytoremediation efficiency of polycyclic aromatic hydrocarbons. *Chemosphere* **2013**, *92*, (6), 688-694.
49. Yan, J.; Quan, G., Sorption behavior of dimethyl phthalate in biochar-soil composites: implications for the transport of phthalate esters in long-term biochar amended soils. *Ecotoxicology and Environmental Safety* **2020**, *205*, 111169.
50. Li, X.; Song, Y.; Wang, F.; Bian, Y.; Jiang, X., Combined effects of maize straw biochar and oxalic acid on the dissipation of polycyclic aromatic hydrocarbons and microbial community structures in soil: a mechanistic study. *Journal of hazardous materials* **2019**, *364*, 325-331.

51. Li, X.; Wang, Y.; Luo, T.; Ma, Y.; Wang, B.; Huang, Q., Remediation potential of immobilized bacterial strain with biochar as carrier in petroleum hydrocarbon and Ni co-contaminated soil. *Environmental Technology* **2022**, *43*, (7), 1068-1081.
52. Kong, L.; Gao, Y.; Zhou, Q.; Zhao, X.; Sun, Z., Biochar accelerates PAHs biodegradation in petroleum-polluted soil by biostimulation strategy. *Journal of hazardous materials* **2018**, *343*, 276-284.
53. Wang, Y.; Wang, Y.-J.; Wang, L.; Fang, G.-D.; Cang, L.; Herath, H.; Zhou, D.-M., Reducing the bioavailability of PCBs in soil to plant by biochars assessed with triolein-embedded cellulose acetate membrane technique. *Environmental pollution* **2013**, *174*, 250-256.
54. Yue, Y.; Shen, C.; Ge, Y., Biochar accelerates the removal of tetracyclines and their intermediates by altering soil properties. *Journal of hazardous materials* **2019**, *380*, 120821.
55. You, X.; Jiang, H.; Zhao, M.; Suo, F.; Zhang, C.; Zheng, H.; Sun, K.; Zhang, G.; Li, F.; Li, Y., Biochar reduced Chinese chive (*Allium tuberosum*) uptake and dissipation of thiamethoxam in an agricultural soil. *Journal of hazardous materials* **2020**, *390*, 121749.
56. Xiang, L.; Sheng, H.; Gu, C.; Marc, R.-G.; Wang, Y.; Bian, Y.; Jiang, X.; Wang, F., Biochar combined with compost to reduce the mobility, bioavailability and plant uptake of 2, 2', 4, 4'-tetrabrominated diphenyl ether in soil. *Journal of hazardous materials* **2019**, *374*, 341-348.
57. Guo, J.; Zheng, L.; Li, Z.; Zhou, X.; Zhang, Q., Effects of various pyrolysis conditions and feedstock compositions on the physicochemical characteristics of cow manure-derived biochar. *Journal of Cleaner Production* **2021**, *311*, (3), 127458.
